# Supplementary material
Source: PubMed Central journal article supplement (PMC8478825)
Supplement: NIHMS1718866-supplement-Supplemental_Material.pdf [file NIHMS1718866-supplement-Supplemental_Material.pdf]

Supplemental Material  
(for online data supplement)

Table I. STROBE Statement Checklist.

|                           | Item No | Recommendation                                                                                                                                                                                    |          |
|---------------------------|---------|---------------------------------------------------------------------------------------------------------------------------------------------------------------------------------------------------|----------|
| <b>Title and abstract</b> | 1       | (a) Indicate the study's design with a commonly used term in the title or the abstract                                                                                                            | 1        |
|                           |         | (b) Provide in the abstract an informative and balanced summary of what was done and what was found                                                                                               | 1        |
| <b>Introduction</b>       |         |                                                                                                                                                                                                   |          |
| Background/rationale      | 2       | Explain the scientific background and rationale for the investigation being reported                                                                                                              | 3-4      |
| Objectives                | 3       | State specific objectives, including any prespecified hypotheses                                                                                                                                  | 3-4      |
| <b>Methods</b>            |         |                                                                                                                                                                                                   |          |
| Study design              | 4       | Present key elements of study design early in the paper                                                                                                                                           | 4        |
| Setting                   | 5       | Describe the setting, locations, and relevant dates, including periods of recruitment, exposure, follow-up, and data collection                                                                   | 4        |
| Participants              | 6       | (a) Give the eligibility criteria, and the sources and methods of selection of participants                                                                                                       | 4        |
| Variables                 | 7       | Clearly define all outcomes, exposures, predictors, potential confounders, and effect modifiers. Give diagnostic criteria, if applicable                                                          | 5-7      |
| Data sources/measurement  | 8*      | For each variable of interest, give sources of data and details of methods of assessment (measurement). Describe comparability of assessment methods if there is more than one group              | 5-7      |
| Bias                      | 9       | Describe any efforts to address potential sources of bias                                                                                                                                         | 5-6      |
| Study size                | 10      | Explain how the study size was arrived at                                                                                                                                                         | Figure 1 |
| Quantitative variables    | 11      | Explain how quantitative variables were handled in the analyses. If applicable, describe which groupings were chosen and why                                                                      | 6-7      |
| Statistical methods       | 12      | (a) Describe all statistical methods, including those used to control for confounding                                                                                                             | 7, 9     |
|                           |         | (b) Describe any methods used to examine subgroups and interactions                                                                                                                               | 7,9      |
|                           |         | (c) Explain how missing data were addressed                                                                                                                                                       | 6-7      |
|                           |         | (d) If applicable, describe analytical methods taking account of sampling strategy                                                                                                                | NA       |
|                           |         | (e) Describe any sensitivity analyses                                                                                                                                                             | NA       |
| <b>Results</b>            |         |                                                                                                                                                                                                   |          |
| Participants              | 13*     | (a) Report numbers of individuals at each stage of study—eg numbers potentially eligible, examined for eligibility, confirmed eligible, included in the study, completing follow-up, and analysed | Figure 1 |

|                          |     |                                                                                                                                                                                                              |          |
|--------------------------|-----|--------------------------------------------------------------------------------------------------------------------------------------------------------------------------------------------------------------|----------|
|                          |     | (b) Give reasons for non-participation at each stage                                                                                                                                                         | Figure I |
|                          |     | (c) Consider use of a flow diagram                                                                                                                                                                           | Figure I |
| Descriptive data         | 14* | (a) Give characteristics of study participants (eg demographic, clinical, social) and information on exposures and potential confounders                                                                     | 20-21    |
|                          |     | (b) Indicate number of participants with missing data for each variable of interest                                                                                                                          | 20-21    |
| Outcome data             | 15* | Report numbers of outcome events or summary measures                                                                                                                                                         | 8        |
| Main results             | 16  | (a) Give unadjusted estimates and, if applicable, confounder-adjusted estimates and their precision (eg, 95% confidence interval). Make clear which confounders were adjusted for and why they were included | 22-25    |
|                          |     | (b) Report category boundaries when continuous variables were categorized                                                                                                                                    | 20-21    |
|                          |     | (c) If relevant, consider translating estimates of relative risk into absolute risk for a meaningful time period                                                                                             | NA       |
| Other analyses           | 17  | Report other analyses done—eg analyses of subgroups and interactions, and sensitivity analyses                                                                                                               | 7, 9     |
| <b>Discussion</b>        |     |                                                                                                                                                                                                              |          |
| Key results              | 18  | Summarise key results with reference to study objectives                                                                                                                                                     | 11       |
| Limitations              | 19  | Discuss limitations of the study, taking into account sources of potential bias or imprecision. Discuss both direction and magnitude of any potential bias                                                   | 13-14    |
| Interpretation           | 20  | Give a cautious overall interpretation of results considering objectives, limitations, multiplicity of analyses, results from similar studies, and other relevant evidence                                   | 11-14    |
| Generalisability         | 21  | Discuss the generalisability (external validity) of the study results                                                                                                                                        | 14       |
| <b>Other information</b> |     |                                                                                                                                                                                                              |          |
| Funding                  | 22  | Give the source of funding and the role of the funders for the present study and, if applicable, for the original study on which the present article is based                                                | 15       |

Table II. Predictors of overnight increase in fluid shift variables: calf circumference (A), leg fluid volume (B), and neck circumference (C).

**A. Calf circumference  
(n=204)**

| <b>term</b>                                                | <b>estimate</b> | <b>SE</b> | <b>statistic</b> | <b>p value</b> |
|------------------------------------------------------------|-----------------|-----------|------------------|----------------|
| (Intercept)                                                | -0.65           | 0.10      | -6.31            | <0.0001        |
| Age                                                        | -0.01           | 0.01      | -1.76            | 0.08           |
| Women:men                                                  | -0.08           | 0.11      | -0.71            | 0.48           |
| Mexican American: non-Hispanic white                       | 0.00            | 0.11      | -0.02            | 0.98           |
| BMI                                                        | 0.00            | 0.01      | 0.41             | 0.68           |
| In chair, daytime (7 am – 9 pm), hrs                       | -0.03           | 0.02      | -2.12            | 0.04           |
| Congestive heart failure                                   | -0.02           | 0.19      | -0.10            | 0.92           |
| Waist circumference, cm                                    | 0.00            | 0.00      | -0.92            | 0.36           |
| Sequential compression devices, daytime (7 am – 9 pm), hrs | -0.01           | 0.02      | -0.81            | 0.42           |
| Overnight increase in total body water                     | 0.01            | 0.01      | 1.58             | 0.12           |

**B. Leg fluid (n=129)**

| <b>term</b>                                                | <b>estimate</b> | <b>SE</b> | <b>statistic</b> | <b>p value</b> |
|------------------------------------------------------------|-----------------|-----------|------------------|----------------|
| (Intercept)                                                | -153.26         | 22.48     | -6.82            | <0.0001        |
| Age                                                        | -1.80           | 1.13      | -1.58            | 0.12           |
| Women:men                                                  | 5.98            | 24.96     | 0.24             | 0.81           |
| Mexican American: non-Hispanic white                       | 19.83           | 25.05     | 0.79             | 0.43           |
| BMI                                                        | -1.62           | 4.36      | -0.37            | 0.71           |
| In chair, daytime (7 am – 9 pm), hrs                       | -8.42           | 3.48      | -2.42            | 0.02           |
| Congestive heart failure                                   | 3.02            | 54.64     | 0.06             | 0.96           |
| Waist circumference, cm                                    | -1.05           | 1.15      | -0.91            | 0.36           |
| Sequential compression devices, daytime (7 am – 9 pm), hrs | 2.43            | 3.62      | 0.67             | 0.50           |
| Overnight increase in total body water                     | 5.39            | 2.35      | 2.30             | 0.02           |

**C. Neck circumference  
(n=202)**

| <b>term</b> | <b>estimate</b> | <b>SE</b> | <b>statistic</b> | <b>p value</b> |
|-------------|-----------------|-----------|------------------|----------------|
|-------------|-----------------|-----------|------------------|----------------|

|                                                            |       |      |       |      |
|------------------------------------------------------------|-------|------|-------|------|
| (Intercept)                                                | 0.29  | 0.24 | 1.24  | 0.22 |
| Age                                                        | 0.00  | 0.01 | 0.22  | 0.83 |
| Women:men                                                  | -0.31 | 0.25 | -1.25 | 0.21 |
| Mexican American: non-Hispanic white                       | -0.09 | 0.26 | -0.35 | 0.73 |
| BMI                                                        | 0.03  | 0.03 | 1.00  | 0.32 |
| In chair, daytime (7 am – 9 pm), hrs                       | 0.02  | 0.04 | 0.62  | 0.54 |
| Congestive heart failure                                   | 0.52  | 0.46 | 1.13  | 0.26 |
| Waist circumference, cm                                    | -0.01 | 0.01 | -1.39 | 0.17 |
| Sequential compression devices, daytime (7 am – 9 pm), hrs | 0.00  | 0.04 | -0.08 | 0.94 |
| Overnight increase in total body water                     | -0.02 | 0.02 | -0.95 | 0.34 |

Table III. Bivariate associations between nighttime and overnight change in total body fluid measurements (individually: total body water (A), extracellular fluid (B), and intracellular fluid (C)) assessed by bioimpedance spectroscopy and log(REI+1).

| <b>A. Total body water (n=192)</b>   | <b>estimate</b> | <b>SE</b> | <b>p value</b> |
|--------------------------------------|-----------------|-----------|----------------|
| Nighttime measurement                |                 |           |                |
| (Intercept)                          | 2.19            | 0.25      | <0.0001        |
| Total body fluid, nighttime          | 0.01            | 0.00      | <0.0001        |
| Overnight change                     |                 |           |                |
| (Intercept)                          | 2.97            | 0.06      | <0.0001        |
| Total body fluid, overnight increase | 0.01            | 0.01      | 0.48           |

| <b>B. Extracellular fluid (n=192)</b>   | <b>estimate</b> | <b>SE</b> | <b>p value</b> |
|-----------------------------------------|-----------------|-----------|----------------|
| Nighttime measurement                   |                 |           |                |
| (Intercept)                             | 2.06            | 0.24      | <0.0001        |
| Extracellular fluid, nighttime          | 0.02            | 0.01      | <0.0001        |
| Overnight change                        |                 |           |                |
| (Intercept)                             | 2.95            | 0.07      | <0.0001        |
| Extracellular fluid, overnight increase | -0.01           | 0.04      | 0.82           |

| <b>C. Intracellular fluid (n=191)</b>   | <b>estimate</b> | <b>SE</b> | <b>p value</b> |
|-----------------------------------------|-----------------|-----------|----------------|
| Nighttime measurement                   |                 |           |                |
| (Intercept)                             | 2.41            | 0.24      | <0.0001        |
| Intracellular fluid, nighttime          | 0.01            | 0.00      | 0.02           |
| Overnight change                        |                 |           |                |
| (Intercept)                             | 2.96            | 0.06      | <0.0001        |
| Intracellular fluid, overnight increase | 0.01            | 0.01      | 0.40           |

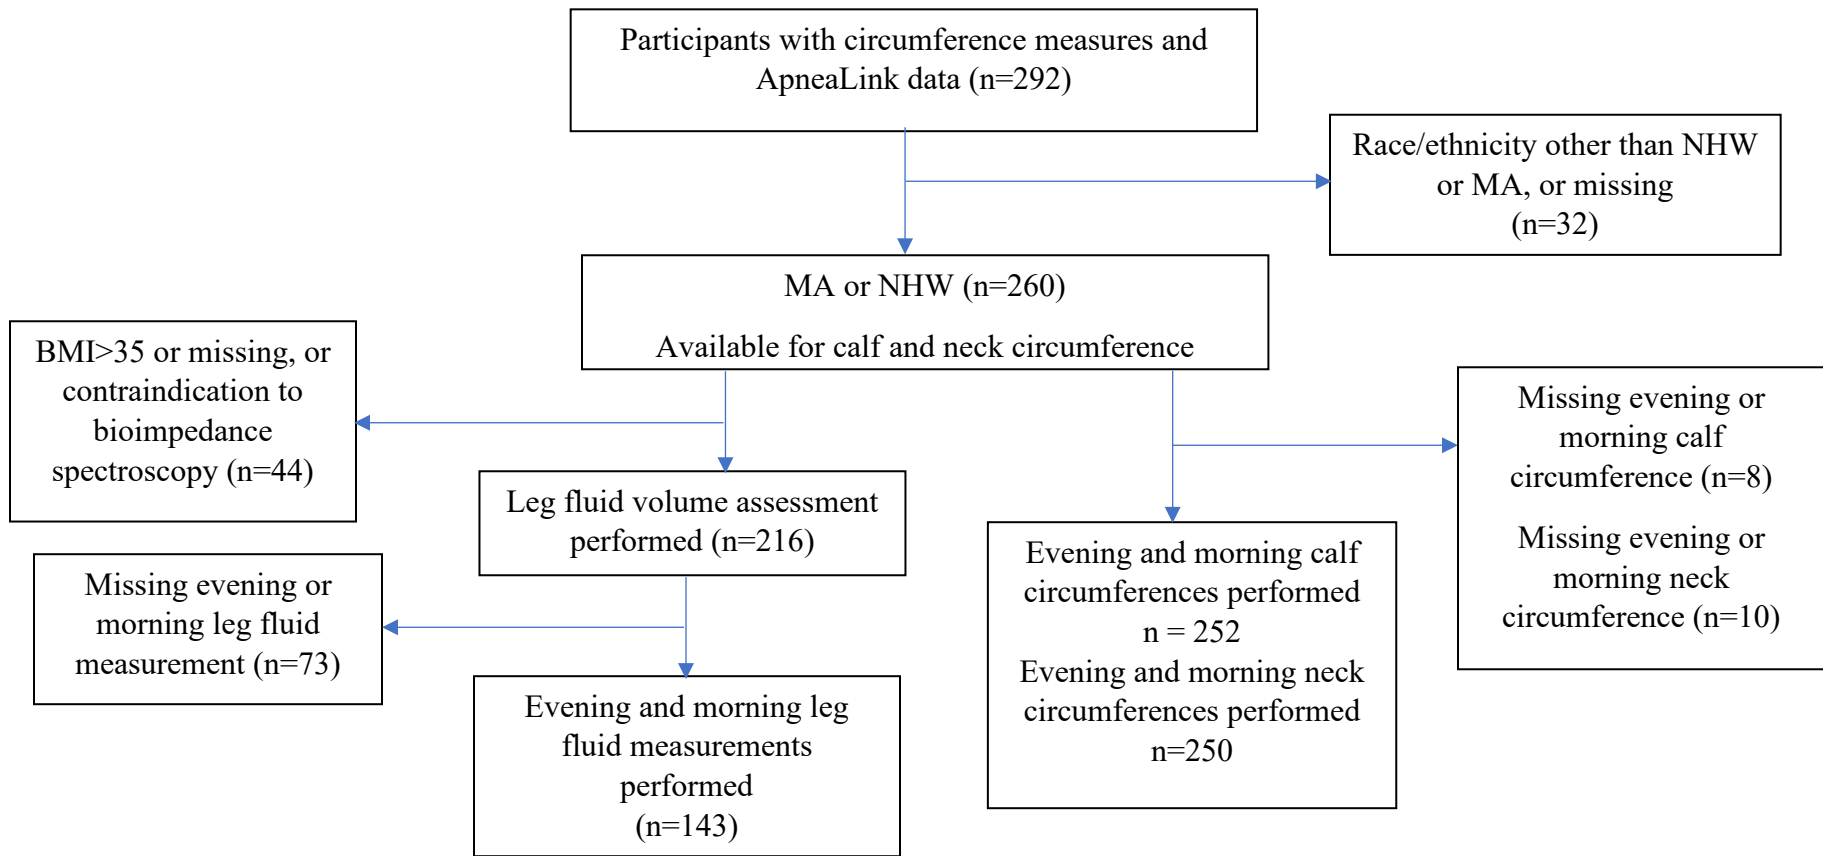

Figure I. Flow diagram
